# Supplementary material
Source: PubMed Central journal article supplement (PMC3000966)
Supplement: supp_M110.164509_jbc.M110.164509-1.pdf [file supp_M110.164509_jbc.M110.164509-1.pdf]

## SUPPLEMENTAL MATERIAL

### REGULATION OF SYK BY PHOSPHORYLATION ON SERINE IN THE LINKER INSERT

Leela L. Paris, Jianji Hu, Jacob Galan, Su Sien Ong, Victoria A. Martin, Haiyan Ma, W. Andy Tao, Marietta L. Harrison and Robert L. Geahlen

#### EXPERIMENTAL PROCEDURES

*Sample preparation*—Beads containing biotinylated peptides were washed 3 times with lysis buffer and three times with H<sub>2</sub>O. Proteins were eluted in 100 mM glycine, pH 2.5 and then neutralized by addition of 1 M Tris-HCl, pH 7.5. Protein samples were reduced with 5 mM dithiothreitol for 30 min at 37°C and then alkylated with 15 mM iodoacetamide for 1 h at room temperature in the dark. Trypsin was added at a 1:50 protease/protein ratio and allowed to digest at 37°C overnight or no longer than 16 h.

For the analysis of Syk-interacting proteins, 20 µl (50% slurry) of GFP nanotrap-Sepharose resin (Chromotek, Germany) was added to precleared lysates from cells expressing Syk-EGFP and incubated for 1 h with rotation at room temperature. GFP nanotrap beads were washed 3 times with lysis buffer and 3 times with H<sub>2</sub>O. Proteins were eluted using 100 µl of 0.2 % RapiGest™ in 50 mM trimethylammonium bicarbonate (TMAB), pH 8.0, at 99°C for 5 min. Proteins were reduced, alkylated and digested with trypsin as described above. RapiGest™ was removed by acidification with 50 mM HCl and incubation for 30 min at 37°C.

*NanoflowLC- MS/MS*—Peptide samples were off-line loaded on a C18 trap column and introduced into an Agilent nanoflow 1100 HPLC system. The nanoflow LC capillary column with integrated electrospray emitter tip was constructed in-house as described (Ficarro, S. B. Zhang, Y. Lu Y., Moghimi, A.R., Askenazi, M., Hyatt, E., Smith, E.D., Boyer, L., Schlaeger, T.M., Luckey, C.J., and Marto, J.A. (2009) *Anal. Chem.* **81**, 3440-3447). The buffer used was 0.1% formic acid with the eluting buffer of 100% CH<sub>3</sub>CN run over a shallow linear gradient over 60 min with a flow rate of 300 nl/min. The Agilent 1100 HPLC system was coupled online to a linear ion trap mass spectrometer (LTQ-Orbitrap XL or LTQ-XL; Thermo Fisher, San Jose, CA). The mass spectrometer was operated in the data-dependent mode in which a full scan MS was followed by MS/MS scans of the 10 most abundant ions with +2 to +3 charge states. The mass exclusion time was 180 s.

*Peptide and protein identification*—The MS/MS data were converted to a mzXML format using the open-source Trans-Peptide Pipeline (TPP) software (Version 2.9.4), and the resulting mzXML files were searched against *Gallus gallus* with *Mus musculus* Syk (32309 entries) or *Homo sapiens* from NCBI using the SEQUEST algorithm on the Sorcerer IDA server (Software Version 2.5.6; SageN, Inc, San Jose, CA, USA). Peptide mass tolerance was set at 10 ppm, and MS/MS tolerance was set internally by the software with accuracy values varying from 0 up to 1 amu. Search criteria included methionine oxidation (15.994 Da) and cysteine alkylation (57.021 Da). Searches were performed with semi-tryptic digestion and allowed maximum 2 missed cleavages on the peptides analyzed from the sequence database. Minimum protein and peptide probabilities were set to 0.8 and 0.9 respectively. For the analysis of phospho-Syk, search criteria included variable serine, threonine, and tyrosine phosphorylation (79.96 Da).

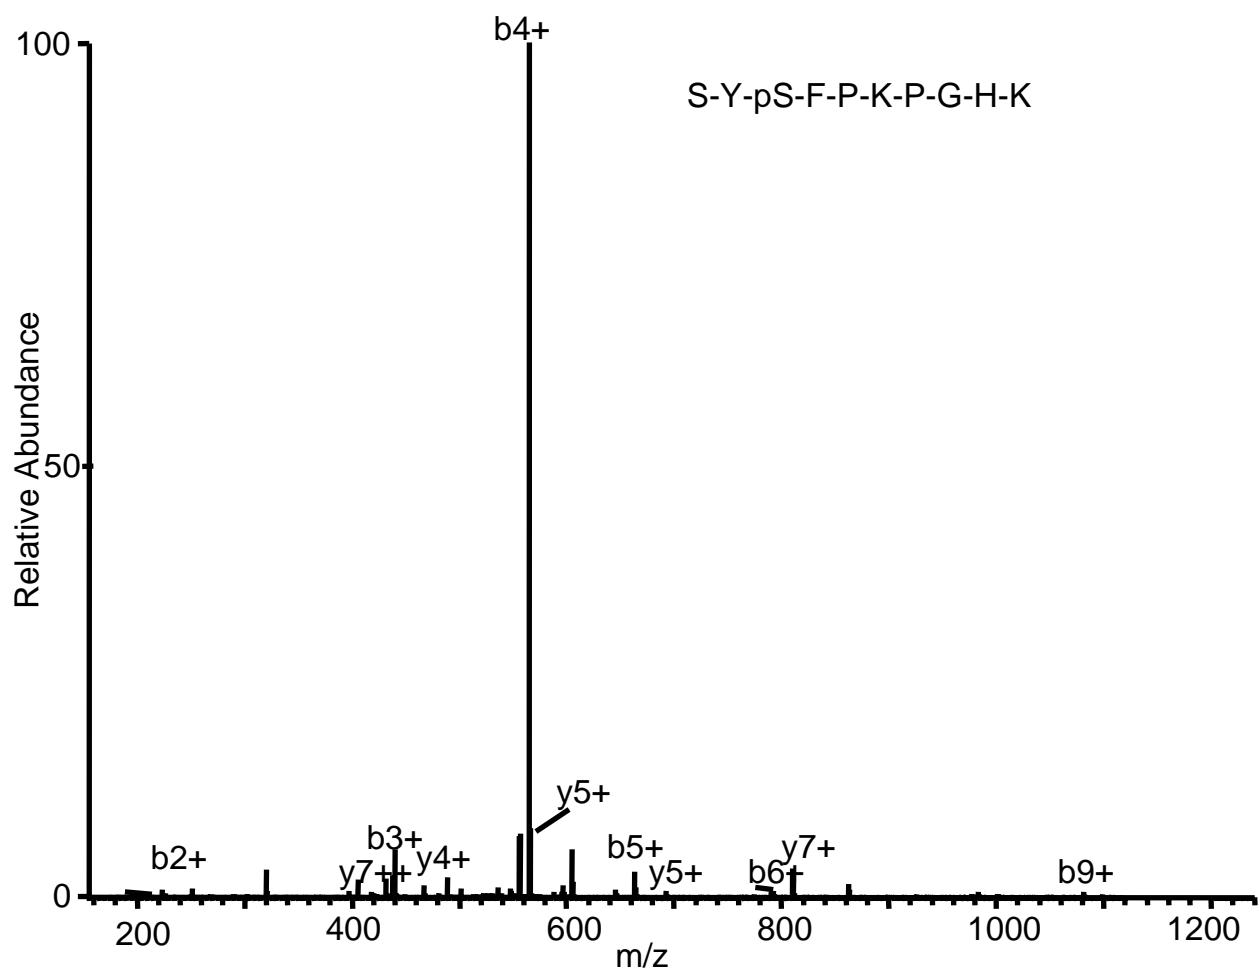

SUPPLEMENTAL FIGURE 1. CID Spectra of Syk-derived phosphopeptide SYpSFPKPGHK, MH+ 1228.26. The characteristic peptide bond fragment ions, type b and y ions, are labeled.

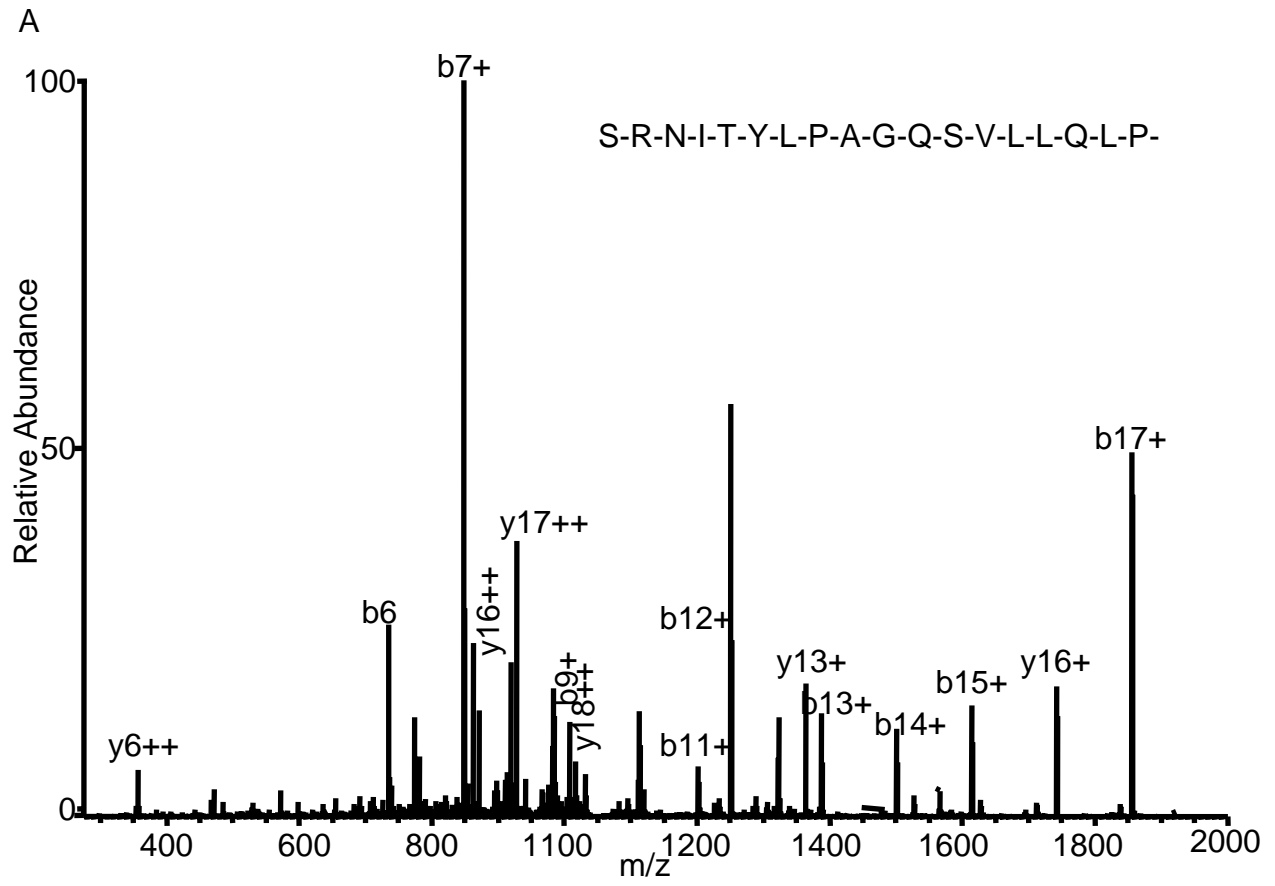

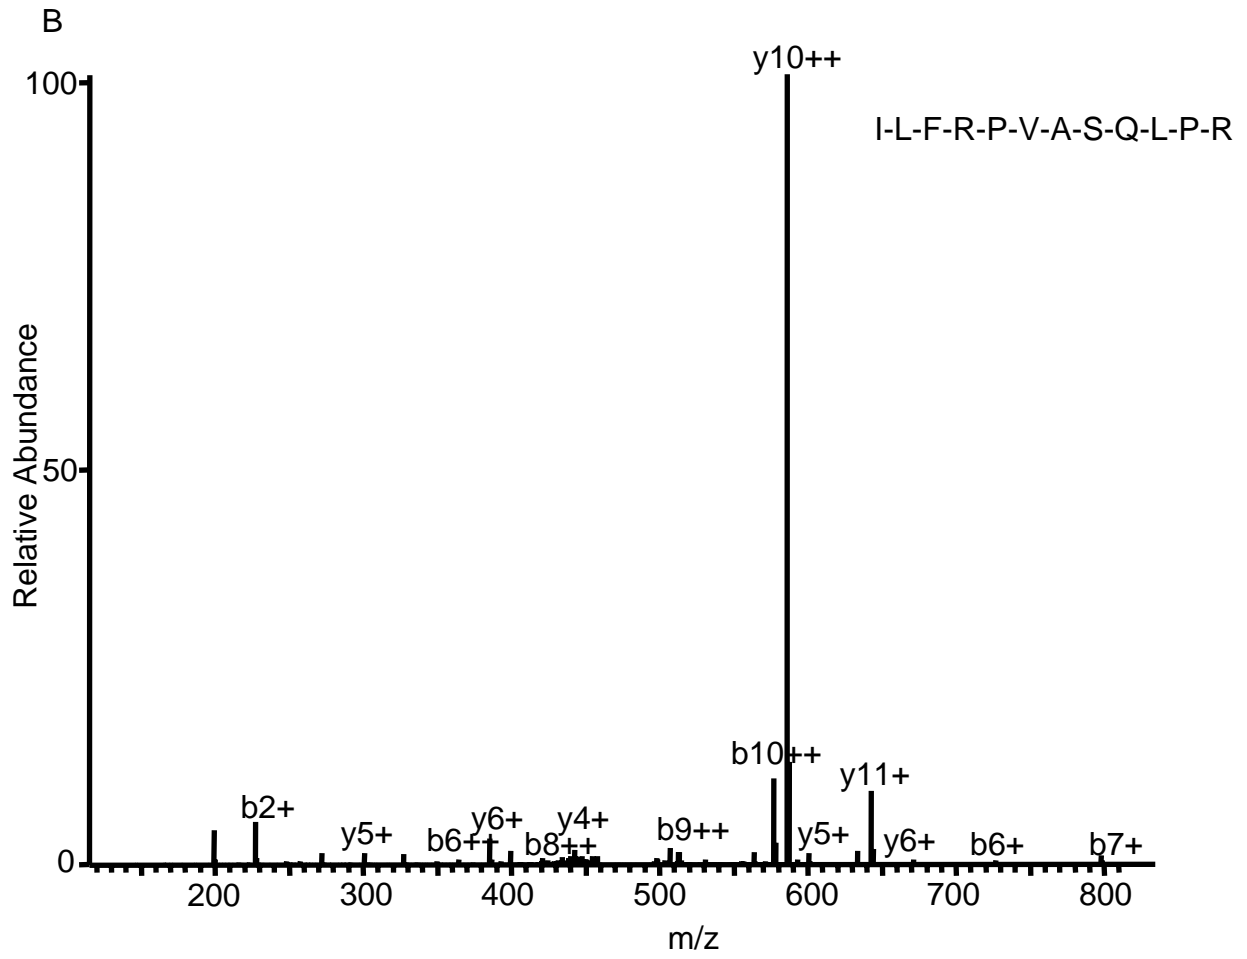

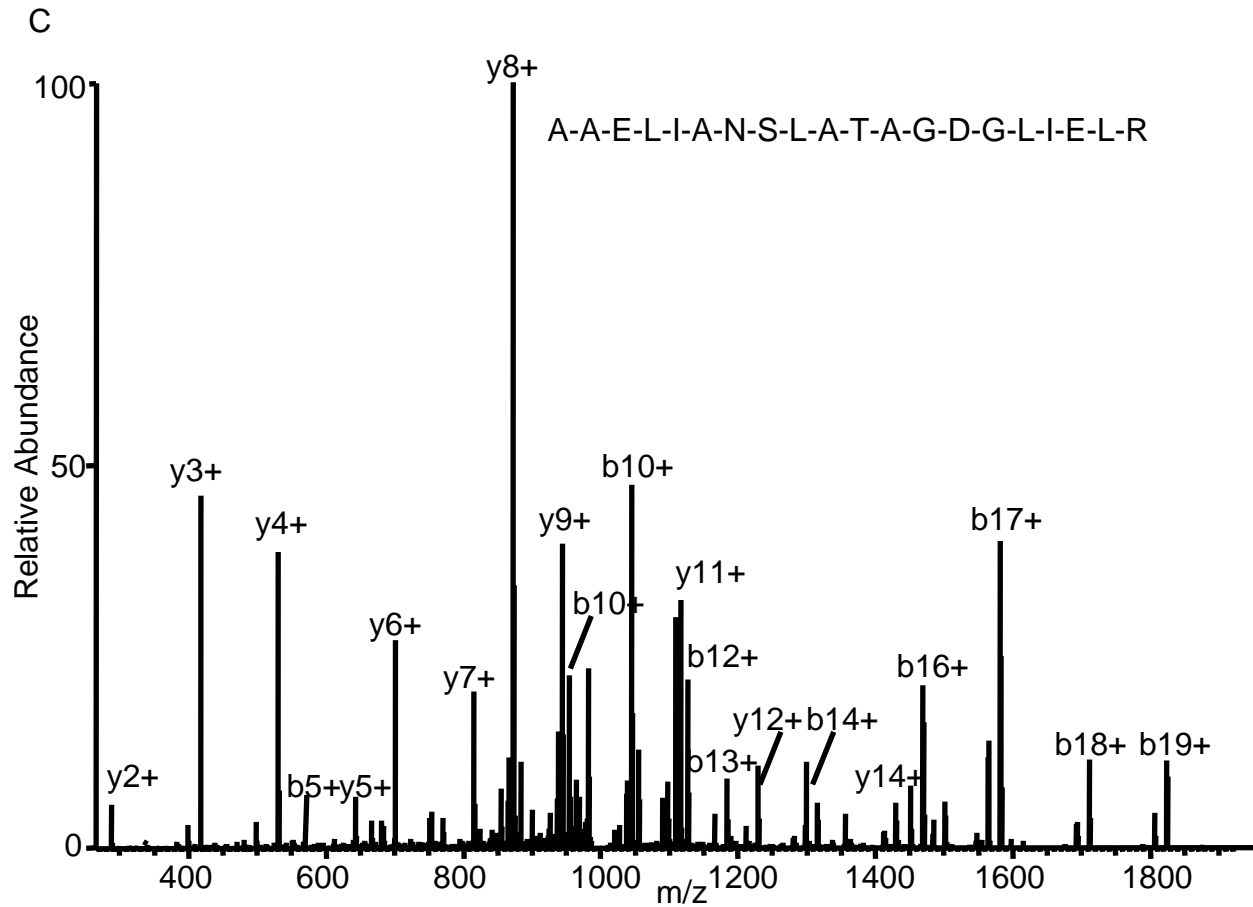

**SUPPLEMENTAL FIGURE 2. CID Spectra of PHB1-derived peptides isolated by phosphopeptide-affinity purification.** A, peptide SRNITYLPAGQSVLLQLPQ, MH<sup>+</sup> 2099.419. B, peptide ILFRPVASQLPR, MH<sup>+</sup> 1397.693. C, peptide AAELIANSLATAGDGLIELR, MH<sup>+</sup> 1999.255. The characteristic peptide bond fragment ions, type b and y ions, are labeled.

SUPPLEMENTAL TABLE I

*Identification of 14-3-3- and PHB1-derived peptides*

Syk-EGFP was immunoprecipitated from stably transfected DT40 cells. Immune complexes analyzed for Syk-associated proteins by proteolysis followed by mass spectrometric analysis as described in Experimental Procedures.

| Protein <sup>a</sup> | Peptide Probability | Precursor charge | Peptide sequence                |
|----------------------|---------------------|------------------|---------------------------------|
| 14-3-3, alpha/beta   | 1                   | 2                | TAFDEAIAELDTLNEESYK             |
|                      | 1                   | 2                | DSTLIMQLLR                      |
| 14-3-3, epsilon      | 1                   | 3                | AAFDDAIAELDTLSEESYK             |
|                      | 1                   | 2                | AASDIAM#TELPPTHPIR <sup>b</sup> |
|                      | 1                   | 2                | VAGM#DVELTVEER <sup>b</sup>     |
| 14-3-3, zeta         | 0.99                | 2                | YLAEVAAGDDKK                    |
|                      | 1                   | 2                | GIVEQSQQAYQEAFEISK              |
| PHB1                 | 1                   | 3                | FDAGELITQR                      |
|                      | 0.99                | 2                | ILFRPVTAQLPR                    |

<sup>a</sup>mzXML file was searched against NCBI chicken (*Gallus gallus*) protein database

<sup>b</sup>#-Methionine oxidation
